# Supplementary material
Source: Springer Nature journal article supplement (https://www.springermedizin.de/resource/supplementary/12913_2012_2375_MOESM3_ESM.pdf/9530548)

**a**

Constant 2005/06 dollars per capita

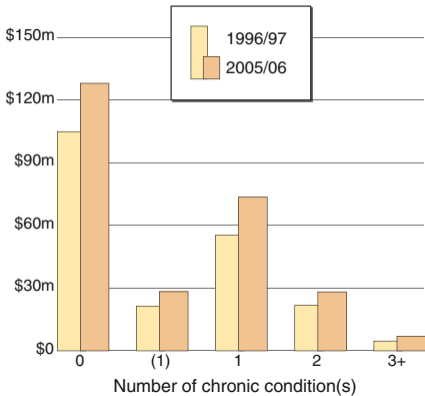**b**

Constant 2005/06 dollars per capita

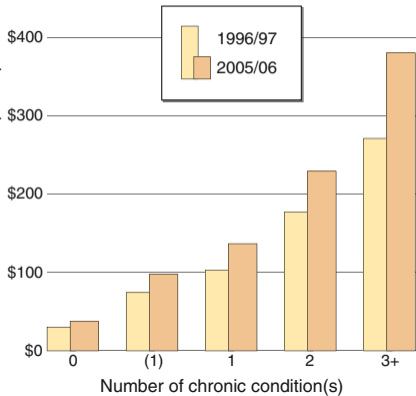

Supplement: MOESM3 [file 9530548]
